# Supplementary material for: Epigenetic silencing of ZCCHC10 by the lncRNA SNHG1 promotes progression and venetoclax resistance of acute myeloid leukemia
Source: PubMed Central journal article supplement — Int J Oncol. 2023 Apr 13;62(5):64. doi: 10.3892/ijo.2023.5512 (PMC10147099; doi:10.3892/ijo.2023.5512), 2023-04-13

Figure S1. Representative images of (A and B) methylcellulose colony formation assays and (C) the number of colonies in triplicate experiments. \*\*P<0.01. sh-, short hairpin; NC, negative control.

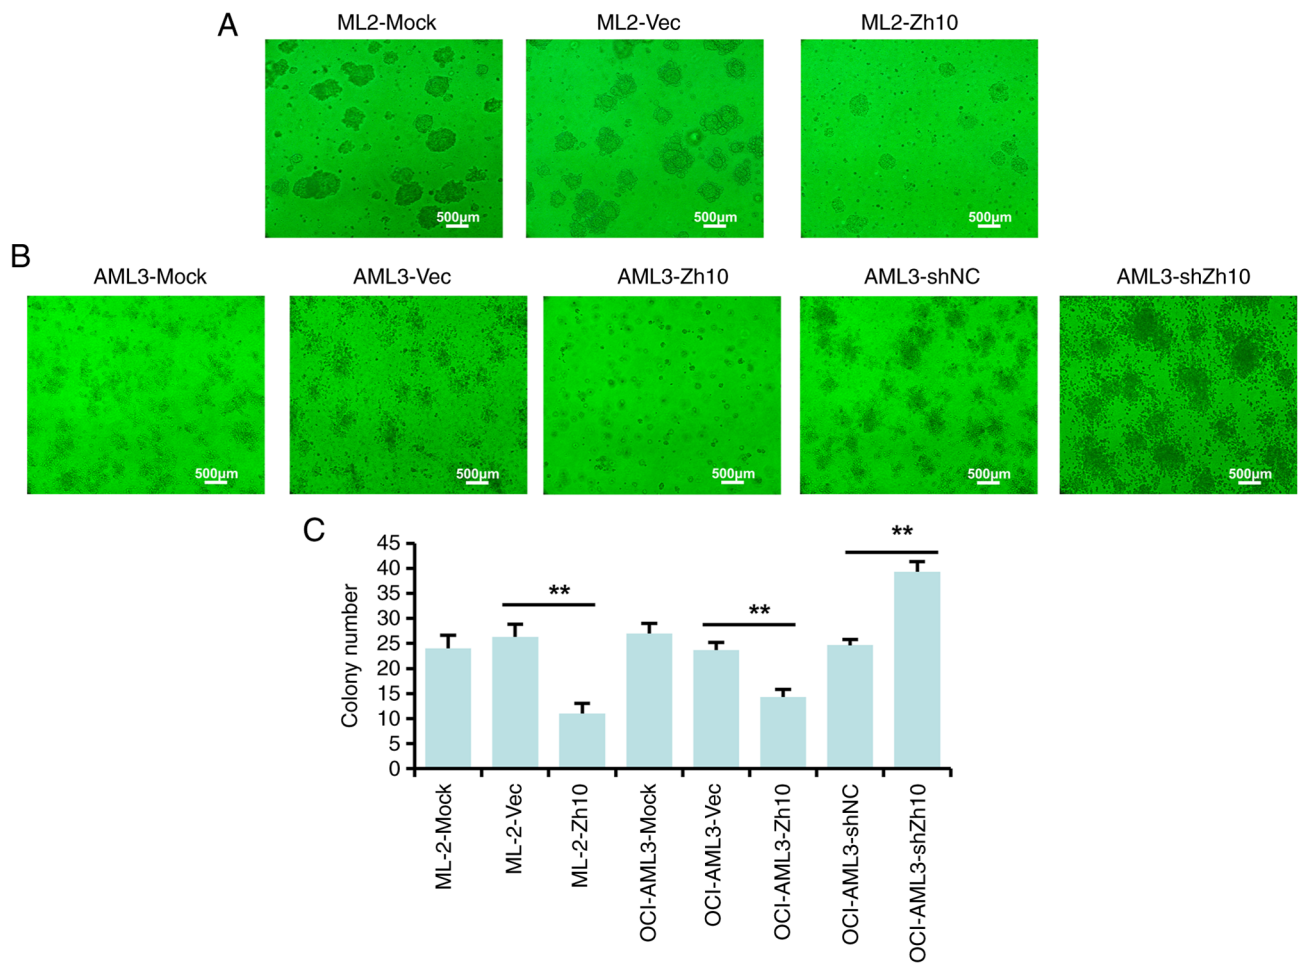

Figure S2. Representative images of flow cytometric analysis of cell cycle.

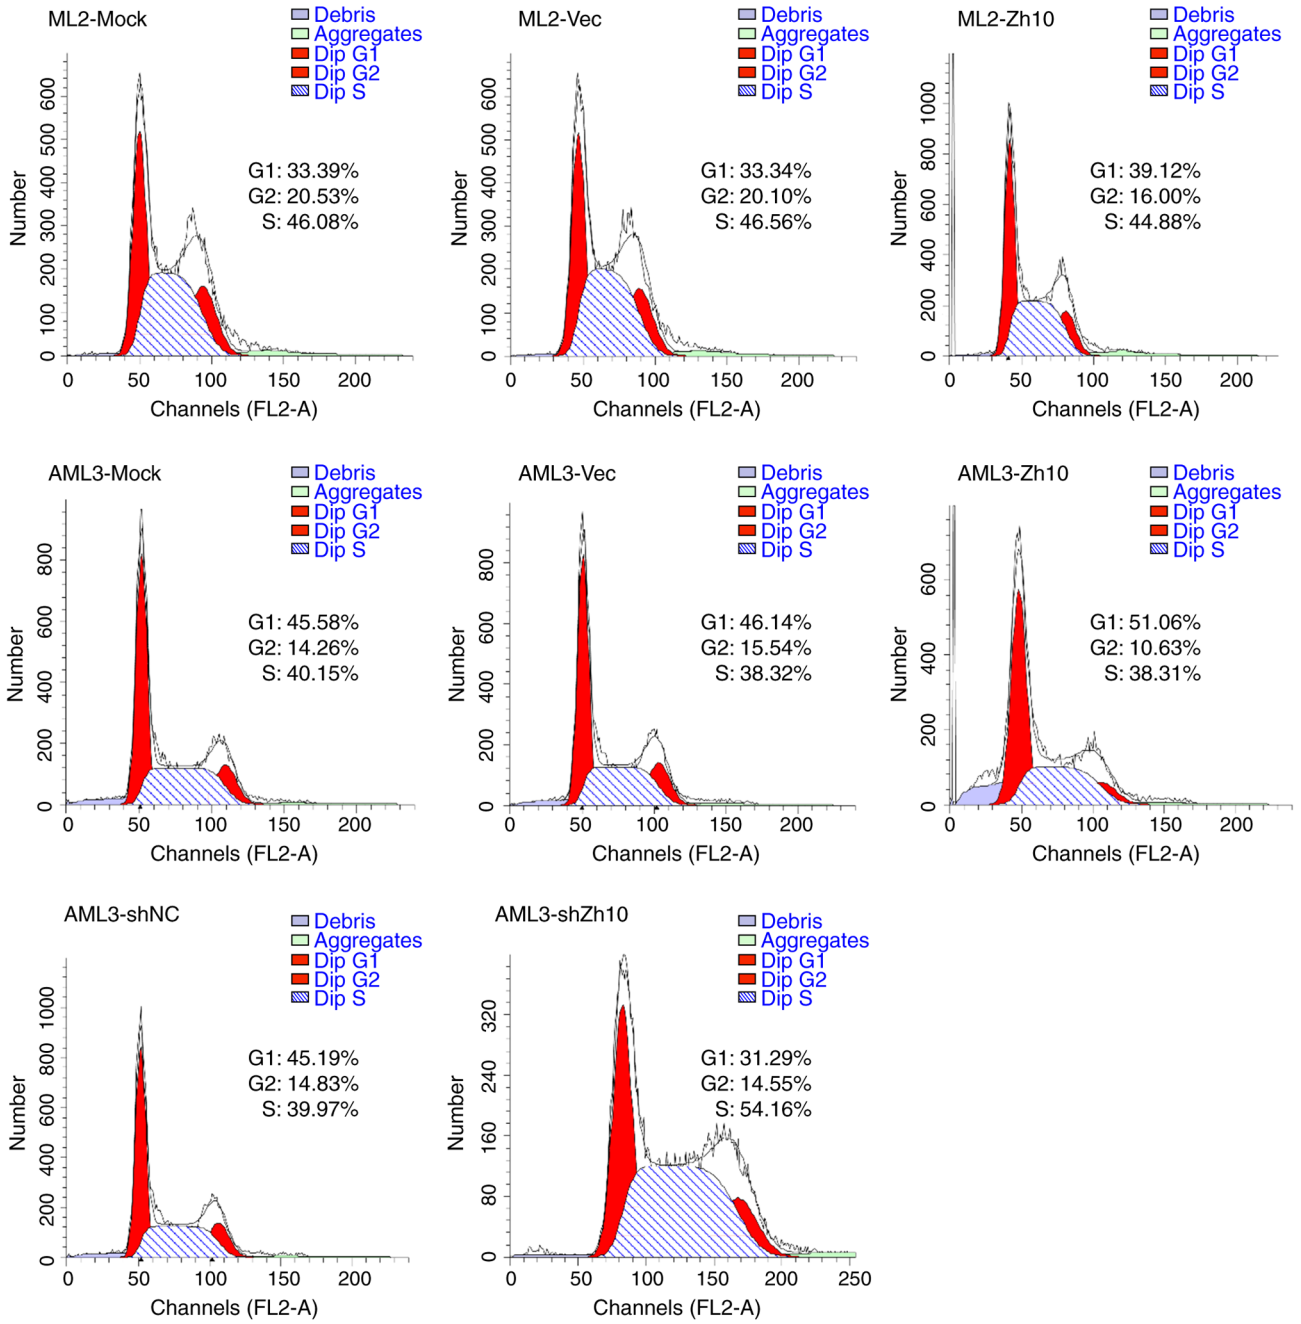

Figure S3. Representative images of flow cytometric analysis of apoptosis. sh-, short hairpin; NC, negative control.

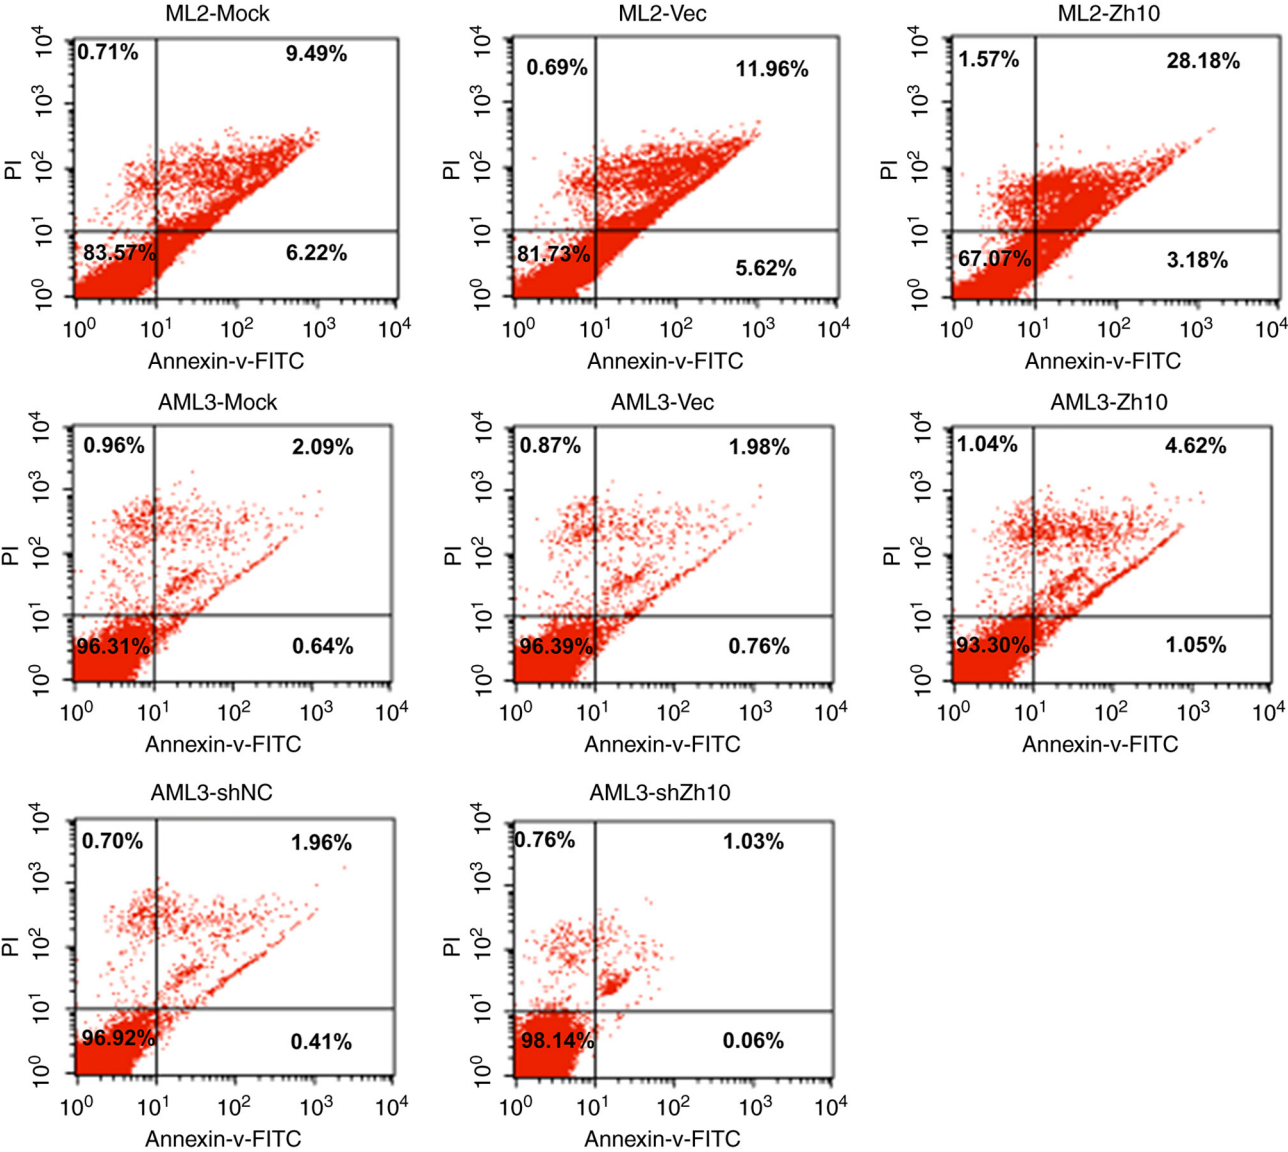

Figure S4. Representative images of flow cytometric analysis of human CD45-cell populations in (A) peripheral blood and (B) bone marrow. Peripheral blood and bone marrow from control mice without transplantation of human acute myeloid leukemia cells as a negative control (blank). PBMC, peripheral blood mononuclear cell; BMMC, bone marrow mononuclear cell.

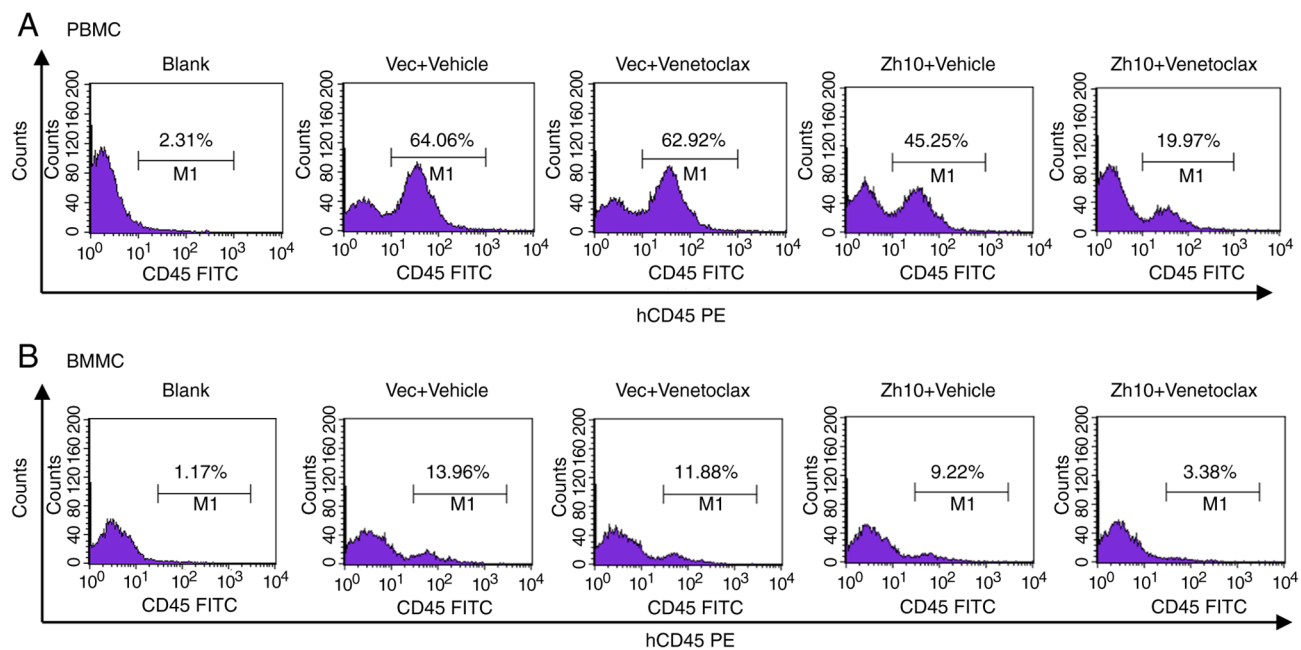

Supplement: Supplementary_Data1.pdf [file Supplementary_Data1.pdf]
