# Supplementary material for: Epigenetic silencing of ZCCHC10 by the lncRNA SNHG1 promotes progression and venetoclax resistance of acute myeloid leukemia
Source: PubMed Central journal article supplement — Int J Oncol. 2023 Apr 13;62(5):64. doi: 10.3892/ijo.2023.5512 (PMC10147099; doi:10.3892/ijo.2023.5512), 2023-04-13
Supplement: Supplementary_Data2.pdf [file Supplementary_Data2.pdf]

Table SI. Antibodies and chemicals used in the present study.

| Name                                    | Company                    | Catalogue number |
|-----------------------------------------|----------------------------|------------------|
| ACTB ( $\beta$ -actin)                  | ABclonal Biotech Co., Ltd. | AC006            |
| Bax                                     | ABclonal Biotech Co., Ltd. | A0207            |
| Bcl2                                    | ABclonal Biotech Co., Ltd. | A0208            |
| Caspase 3                               | ABclonal Biotech Co., Ltd. | A111953          |
| DNMT1                                   | Abcam                      | ab13537          |
| DNMT3b                                  | Abcam                      | ab2851           |
| hCD45                                   | BD Biosciences             | 555480           |
| PE-conjugated hCD45                     | BD Biosciences             | 560975           |
| PE mouse IgG1, $\kappa$ isotype control | BD Biosciences             | 555749           |
| P21                                     | ABclonal Biotech Co., Ltd. | A19094           |
| P53                                     | Abcam                      | Pab1801          |
| PARP1                                   | ABclonal Biotech Co., Ltd. | A11010           |
| ZCCHC10                                 | Sigma-Aldrich; Merck KGaA  | HPA038944        |
| Venetoclax (ABT-199)                    | Selleck Chemicals          | S8048            |
| Decitabine                              | Selleck Chemicals          | S1200            |

Table SII. The sequences of oligonucleotides used in the present study.

| Name                                                 | Primer sequence (5'→3')                                          |
|------------------------------------------------------|------------------------------------------------------------------|
| Primers for RT-qPCR                                  |                                                                  |
| 18 S rRNA                                            | F: CGGCGACGACCCATTCGAAC<br>R: GAATCGAACCTGATTCCCCGTC             |
| SNHG1                                                | F: GCCAGCACCTTCTCTCTAAAGC<br>R: GTCCTCCAAGACAGATTCCATTTT         |
| ZCCHC10                                              | F: TAGCCCGGAGACAAGCTGAAG<br>R: TGGTTTCTCCAATGCTTTGTTGC           |
| Primers for semi-RT-qPCR                             |                                                                  |
| SNHG1                                                | F: GCAGTTGAGGGTTTGCTGTG<br>R: GCAAGGCCCTGAATGAGCTA               |
| Primers for Methylation specific-PCR of ZCCHC10 gene |                                                                  |
| outer primer                                         | F: TTTTTTTTAGAAGTTTGTGGTTT<br>R: ACTTCAAACCTCCCCTATCCAC          |
| methylated                                           | F: CGGTTAATAGTTCGGAGATAAGC<br>R: GAAAACCAAAAAAATATTTAAAAAACGAA   |
| unmethylated                                         | F: TGGTTAATAGTTTGGAGATAAGTGT<br>R: CAAAAACCAAAAAAATATTTAAAAACAAA |
| Primers for Chromatin Immunoprecipitation-PCR        |                                                                  |
| ZCCHC10                                              | F:AGCCGGCACTAAGATACCTC<br>R:TGGGCTGGACACTGAATAGG                 |

F, forward; R, reverse; RT-qPCR, reverse transcription-quantitative PCR.
